# Supplementary material for: Colchicine Use and Risks of Stroke Recurrence in Acute Non-Cardiogenic Ischemic Stroke Patients: A Population-Based Cohort Study
Source: MDPI journal article supplement (doi:10.3390/jpm11090935), 2021-09-19
Supplement: s1 [file s1]

## Supplementary files

**Supplemental Figure S1.** Pre-specified subgroup analyses comparing the risk of 2-year recurrent ischemic stroke between long-term colchicine users and former colchicine users in the study cohort after IPTW.

IPTW, inverse probability of treatment weights.

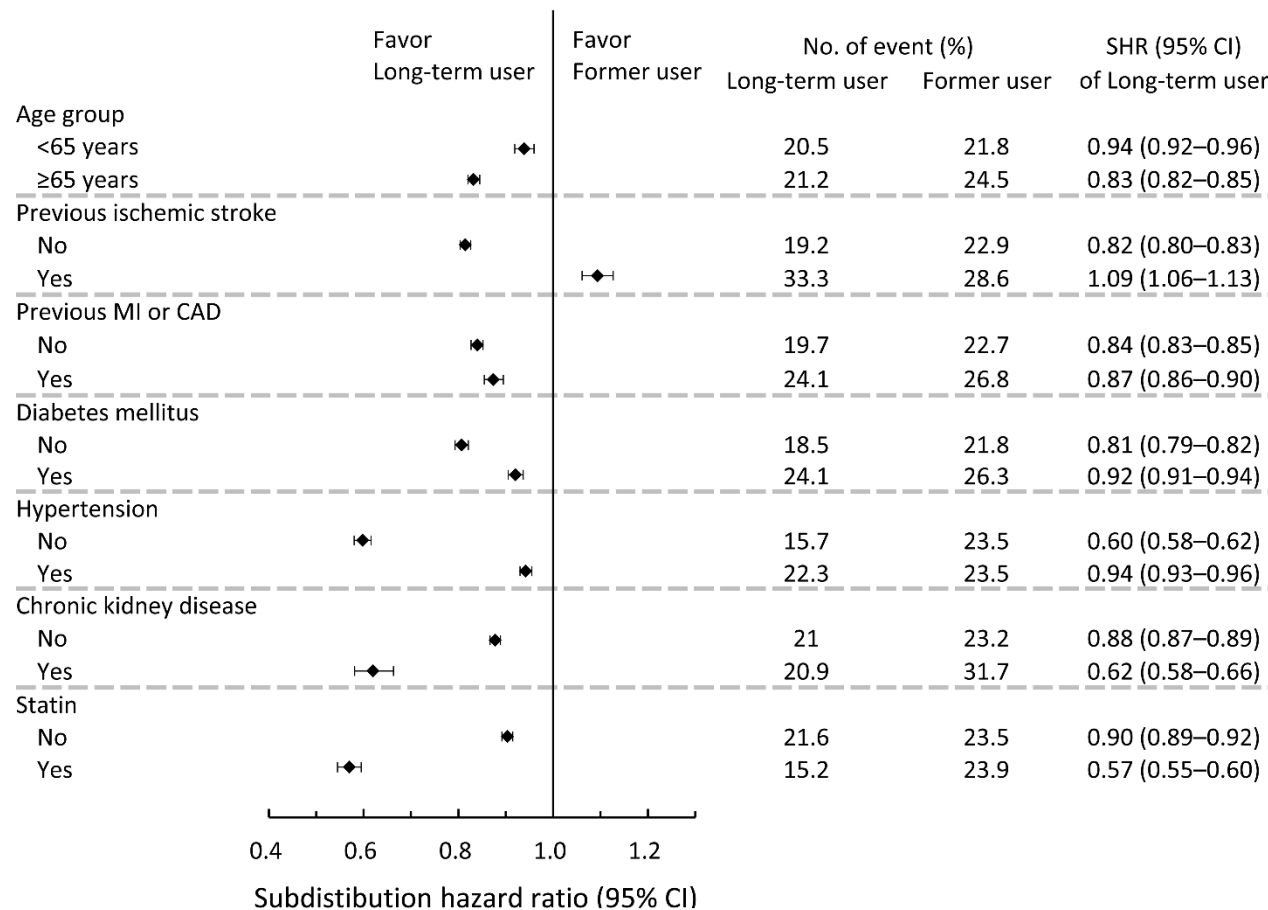

**Supplemental Table S1.** Baseline characteristics of patients after IPTW

| Variable                           | Non-chronic use category          |                               | Chronic use category              |                                      | MASD |
|------------------------------------|-----------------------------------|-------------------------------|-----------------------------------|--------------------------------------|------|
|                                    | Non-user<br>( <i>n</i> = 355,498) | New user<br>( <i>n</i> = 912) | Former user<br>( <i>n</i> = 4737) | Long-term user<br>( <i>n</i> = 4354) |      |
| Age, years                         | 68.6 ± 11.8                       | 69.6 ± 10.3                   | 68.9 ± 11.1                       | 68.9 ± 11.1                          | 0.08 |
| Age group, year                    |                                   |                               |                                   |                                      |      |
| 40-64 years                        | 36.8                              | 30.5                          | 35.0                              | 33.6                                 | 0.14 |
| 65-74 years                        | 30.1                              | 35.8                          | 31.5                              | 32.6                                 | 0.12 |
| ≥75 years                          | 33.1                              | 33.7                          | 33.5                              | 33.8                                 | 0.02 |
| Male sex                           | 57.6                              | 60.2                          | 61.8                              | 61.9                                 | 0.09 |
| Hospital level                     |                                   |                               |                                   |                                      |      |
| Medical center (teaching hospital) | 28.8                              | 26.7                          | 29.6                              | 34.2                                 | 0.16 |
| Regional / district hospital       | 71.2                              | 73.3                          | 70.4                              | 65.8                                 | 0.16 |
| Comorbidity                        |                                   |                               |                                   |                                      |      |
| Previous ischemic stroke           | 9.7                               | 14.4                          | 10.2                              | 12.8                                 | 0.16 |
| Previous hemorrhagic stroke        | 1.10                              | 0.49                          | 0.76                              | 2.11                                 | 0.16 |
| Gout                               | 7.0                               | 9.5                           | 7.9                               | 10.8                                 | 0.15 |
| Diabetes mellitus                  | 38.3                              | 43.8                          | 37.9                              | 43.8                                 | 0.12 |
| Hypertension                       | 75.0                              | 81.8                          | 77.6                              | 80.0                                 | 0.16 |
| Previous myocardial infarction     | 2.0                               | 2.3                           | 1.9                               | 3.0                                  | 0.08 |
| Coronary artery disease            | 19.4                              | 24.2                          | 19.3                              | 29.5                                 | 0.26 |
| Chronic kidney disease             | 2.8                               | 4.8                           | 3.2                               | 3.1                                  | 0.12 |
| COPD                               | 8.8                               | 12.2                          | 10.0                              | 12.7                                 | 0.14 |
| Dyslipidemia                       | 33.0                              | 28.4                          | 34.8                              | 36.7                                 | 0.18 |
| Previous malignancy                | 4.3                               | 5.7                           | 4.4                               | 4.9                                  | 0.07 |

| Variable                                   | Non-chronic use category          |                               | Chronic use category              |                                      | MASD |
|--------------------------------------------|-----------------------------------|-------------------------------|-----------------------------------|--------------------------------------|------|
|                                            | Non-user<br>( <i>n</i> = 355,498) | New user<br>( <i>n</i> = 912) | Former user<br>( <i>n</i> = 4737) | Long-term user<br>( <i>n</i> = 4354) |      |
| Carotid stenting or endarterectomy         | 0.19                              | 0.00                          | 0.07                              | 0.12                                 | 0.04 |
| CCI score                                  | 2.5 ± 1.6                         | 2.6 ± 1.5                     | 2.4 ± 1.5                         | 2.5 ± 1.4                            | 0.09 |
| Estimated NIHSS                            | 6.6 ± 5.1                         | 5.9 ± 4.3                     | 6.4 ± 4.9                         | 6.1 ± 4.3                            | 0.14 |
| Estimated NIHSS group                      |                                   |                               |                                   |                                      |      |
| ≤5                                         | 68.8                              | 75.9                          | 69.9                              | 70.3                                 | 0.15 |
| 6-13                                       | 19.3                              | 15.6                          | 19.6                              | 20.0                                 | 0.11 |
| >13                                        | 11.9                              | 8.4                           | 10.5                              | 9.8                                  | 0.11 |
| Anti-hypertensive agent                    |                                   |                               |                                   |                                      |      |
| ACEI/ARB                                   | 46.4                              | 50.9                          | 48.7                              | 50.9                                 | 0.09 |
| CCB                                        | 42.3                              | 47.9                          | 46.5                              | 40.9                                 | 0.14 |
| Alpha-blocker                              | 5.9                               | 7.2                           | 7.1                               | 7.1                                  | 0.05 |
| Beta-blocker                               | 24.8                              | 29.8                          | 25.5                              | 27.5                                 | 0.12 |
| Thiazide                                   | 5.2                               | 3.6                           | 4.7                               | 5.0                                  | 0.07 |
| Loop diuretics                             | 6.0                               | 9.9                           | 6.9                               | 8.3                                  | 0.16 |
| Spironolactone                             | 0.98                              | 0.95                          | 0.69                              | 0.34                                 | 0.07 |
| Others                                     | 2.20                              | 2.99                          | 2.38                              | 0.74                                 | 0.15 |
| Number of anti-hypertensive agents         |                                   |                               |                                   |                                      |      |
| 0                                          | 28.8                              | 23.1                          | 26.2                              | 27.9                                 | 0.15 |
| 1-2                                        | 54.9                              | 54.5                          | 56.0                              | 54.7                                 | 0.03 |
| 3-4                                        | 15.5                              | 22.1                          | 17.0                              | 16.9                                 | 0.16 |
| ≥5                                         | 0.77                              | 0.33                          | 0.90                              | 0.47                                 | 0.05 |
| Average numbers of antihypertensive agents | 1.34 ± 1.16                       | 1.53 ± 1.19                   | 1.42 ± 1.18                       | 1.41 ± 1.17                          | 0.17 |

| Variable                              | Non-chronic use category          |                               | Chronic use category              |                                      | MASD |
|---------------------------------------|-----------------------------------|-------------------------------|-----------------------------------|--------------------------------------|------|
|                                       | Non-user<br>( <i>n</i> = 355,498) | New user<br>( <i>n</i> = 912) | Former user<br>( <i>n</i> = 4737) | Long-term user<br>( <i>n</i> = 4354) |      |
| Antidiabetic agent                    |                                   |                               |                                   |                                      |      |
| Biguanide (Metformin)                 | 21.8                              | 23.5                          | 20.3                              | 22.1                                 | 0.08 |
| TZD                                   | 3.2                               | 3.8                           | 3.0                               | 3.7                                  | 0.05 |
| Sulfonylurea                          | 22.4                              | 26.4                          | 20.9                              | 22.3                                 | 0.13 |
| DPP4i                                 | 2.5                               | 2.4                           | 2.5                               | 2.4                                  | 0.01 |
| Glinide                               | 3.4                               | 4.5                           | 4.0                               | 4.7                                  | 0.08 |
| Alpha Glucosidase inhibitors          | 3.9                               | 5.3                           | 2.7                               | 5.6                                  | 0.15 |
| Insulin                               | 4.7                               | 4.6                           | 4.8                               | 6.5                                  | 0.09 |
| Average number of antidiabetic agents | 0.62 ± 1.02                       | 0.71 ± 1.10                   | 0.58 ± 0.99                       | 0.67 ± 1.03                          | 0.12 |
| Other medications                     |                                   |                               |                                   |                                      |      |
| Aspirin                               | 17.5                              | 21.4                          | 17.2                              | 27.6                                 | 0.27 |
| Clopidogrel                           | 1.3                               | 1.1                           | 1.5                               | 2.2                                  | 0.10 |
| Cilostazol                            | 0.52                              | 0.78                          | 0.53                              | 0.45                                 | 0.05 |
| Statin                                | 8.3                               | 8.9                           | 8.2                               | 10.3                                 | 0.08 |
| Fibrate                               | 5.5                               | 6.8                           | 6.0                               | 8.5                                  | 0.13 |
| NSAIDs including Cox-2                | 22.5                              | 29.7                          | 25.6                              | 28.6                                 | 0.17 |
| Steroid                               | 2.5                               | 4.5                           | 3.3                               | 2.0                                  | 0.16 |
| Gout medications                      |                                   |                               |                                   |                                      |      |
| Allopurinol                           | 1.5                               | 1.8                           | 1.7                               | 2.3                                  | 0.06 |
| Benzbromarone                         | 2.4                               | 3.1                           | 2.7                               | 3.7                                  | 0.09 |
| Sulfinpyrazone                        | 0.13                              | 0.09                          | 0.12                              | 0.13                                 | 0.01 |
| Febuxostat                            | 0.004                             | 0.000                         | 0.006                             | 0.002                                | 0.01 |

| Variable       | Non-chronic use category          |                               | Chronic use category              |                                      | MASD |
|----------------|-----------------------------------|-------------------------------|-----------------------------------|--------------------------------------|------|
|                | Non-user<br>( <i>n</i> = 355,498) | New user<br>( <i>n</i> = 912) | Former user<br>( <i>n</i> = 4737) | Long-term user<br>( <i>n</i> = 4354) |      |
| Follow-up year | 5.0 ± 3.6                         | 5.1 ± 3.3                     | 4.9 ± 3.5                         | 4.9 ± 3.4                            | 0.21 |

IPTW, inverse probability of treatment weighting; MASD, maximum absolute standardized difference; COPD, chronic obstruction pulmonary disease; CCI, Charlson comorbidity index; NIHSS, National Institute of Health Stroke Scale; ACEI, angiotensin-converting enzyme inhibitors; ARB, angiotensin receptor blockers; CCB, calcium channel blocker; TZD, thiazolidinedione; DPP4i, dipeptidyl peptidase-4 inhibitor; NASIDs, non-steroidal anti-inflammatory drug

Data were presented as frequency (percentage) or mean ± standard deviation.

**Supplemental table S2.** Long-term outcome of study patients before IPTW

| Variable                          | Non-chronic use category          |                               | Chronic use category              |                                      |
|-----------------------------------|-----------------------------------|-------------------------------|-----------------------------------|--------------------------------------|
|                                   | Non-user<br>( <i>n</i> = 355,498) | New user<br>( <i>n</i> = 912) | Former user<br>( <i>n</i> = 4737) | Long-term user<br>( <i>n</i> = 4354) |
| 6 month                           |                                   |                               |                                   |                                      |
| Primary outcome                   |                                   |                               |                                   |                                      |
| Recurrence of ischemic stroke     | 48,135 (13.5)                     | 122 (13.4)                    | 712 (15.0)                        | 642 (14.7)                           |
| Secondary outcome                 |                                   |                               |                                   |                                      |
| Cardiovascular death              | 9,481 (2.7)                       | 35 (3.8)                      | 160 (3.4)                         | 152 (3.5)                            |
| All-cause mortality               | 17,325 (4.9)                      | 53 (5.8)                      | 260 (5.5)                         | 255 (5.9)                            |
| New-diagnosed atrial fibrillation | 11,716 (3.3)                      | 42 (4.6)                      | 188 (4.0)                         | 164 (3.8)                            |
| 2 year                            |                                   |                               |                                   |                                      |
| Primary outcome                   |                                   |                               |                                   |                                      |
| Recurrence of ischemic stroke     | 74,581 (21.0)                     | 210 (23.0)                    | 1,089 (23.0)                      | 996 (22.9)                           |
| Secondary outcome                 |                                   |                               |                                   |                                      |
| Cardiovascular death              | 23,848 (6.7)                      | 79 (8.7)                      | 350 (7.4)                         | 382 (8.8)                            |
| All-cause mortality               | 44,570 (12.5)                     | 129 (14.1)                    | 614 (13.0)                        | 657 (15.1)                           |
| New-diagnosed atrial fibrillation | 17,970 (5.1)                      | 67 (7.3)                      | 286 (6.0)                         | 265 (6.1)                            |

Data were presented as frequency (percentage).
